1     **Evaluation of the Abbott ARCHITECT HIV Ag/Ab Combo Assay for Determining**  
2                                                             **Recent HIV-1 Infection**

3     Kelly A. Curtis<sup>1\*</sup>, Donna L. Rudolph<sup>1</sup>, Yi Pan<sup>1</sup>, Kevin Delaney<sup>1</sup>, Kathryn Anastos<sup>2</sup>, Jack DeHovitz<sup>2</sup>,  
4     Seble G. Kassaye<sup>2</sup>, Carl V. Hanson<sup>2</sup>, Audrey L. French<sup>2</sup>, Elizabeth Golub<sup>2</sup>, Adaora A. Adimora<sup>2</sup>, Igho  
5     Ofotokun<sup>2</sup>, Hector Bolivar<sup>2</sup>, Mirjam-Colette Kempf<sup>2</sup>, Philip J. Peters<sup>1</sup>, and William M. Switzer<sup>1</sup>

6     <sup>1</sup>Division of HIV/ AIDS Prevention, National Center for HIV/AIDS, Hepatitis, STD, and TB  
7     Prevention, Centers for Disease Control and Prevention, Atlanta, Georgia, United States of America

8     <sup>2</sup>Women’s Interagency HIV Study (WIHS)

9

10    \*Corresponding author

11    Email: [czv2@cdc.gov](mailto:czv2@cdc.gov) (KC)

12

13

14    **Conflicts of Interest and Sources of Funding:** No conflicts of interest were declared. This work was  
15    supported through intramural CDC funding.

17 **Background:** Given the challenges and costs associated with implementing HIV-1 incidence assay  
18 testing, there is great interest in evaluating the use of commercial HIV diagnostic tests for determining  
19 recent HIV infection. A diagnostic test with the capability of providing reliable data for the  
20 determination of recent HIV infection without substantial modifications to the test protocol would have  
21 a significant impact on HIV surveillance. The Abbott ARCHITECT HIV Ag/Ab Combo Assay is an  
22 antigen/antibody immunoassay, which meets the criteria as the first screening test in the recommended  
23 HIV laboratory diagnostic algorithm for the United States.

24 **Methods:** In this study, we evaluated the performance characteristics of the ARCHITECT HIV Ag/Ab  
25 Combo signal-to-cutoff ratio (S/Co) for determining recent infection, including estimation of the mean  
26 duration of recent infection (MDRI) and false recent rate (FRR), and selection of recency cutoffs.

27 **Results:** The MDRI estimates for the S/Co recency cutoff of 400 is within the 4 to 12 months range  
28 recommended for HIV incidence assays, and the FRR rate for this cutoff was 1.5%. Additionally,  
29 ARCHITECT Combo S/Co values were compared relative to diagnostic test results from two prior  
30 prospective HIV-1 diagnostic studies in order to validate the use of the S/Co for both diagnostic and  
31 recency determination.

32 **Conclusion:** Dual-use of the ARCHITECT Combo assay data for diagnostic and incidence purposes  
33 would reduce the need for separate HIV incidence testing and allow for monitoring of recent infection  
34 for incidence estimation and other public health applications.

35

36

## 37 Introduction

38

39 In 2014, Centers for Disease Control and Prevention (CDC) and the Association of Public Health  
40 Laboratories (APHL) issued updated HIV testing recommendations for laboratory diagnosis of HIV in  
41 the United States (US)[1]. The revised guidelines recommend use of Food and Drug Administration  
42 (FDA)-approved HIV tests with improved detection of acute HIV-1 infection, as well as HIV-2. The  
43 recommended diagnostic algorithm involves screening with a HIV-1/HIV-2 antigen (Ag)/antibody (Ab)  
44 combination immunoassay, followed by confirmation with an HIV-1/HIV-2 antibody differentiation  
45 immunoassay. Specimens that yield discordant or indeterminate immunoassay test results should be  
46 resolved with an HIV-1 nucleic acid test (NAT) to diagnose potential acute infection. Several studies  
47 have addressed the performance of the diagnostic algorithm with various combinations of FDA-  
48 approved diagnostic tests that meet the algorithm criteria [2-6]. The ARCHITECT HIV Ag/Ab Combo  
49 assay ([ARCHITECT] Abbott Laboratories, Chicago, IL) is one example of an HIV Ag/Ab combination  
50 immunoassay that is commercially available in the US and FDA-approved for HIV diagnosis.

51 The performance characteristics of the ARCHITECT suggest that the assay may also be useful  
52 for distinguishing recent from late or chronic HIV infection for the purposes of estimating HIV-1  
53 incidence. The ARCHITECT is a chemiluminescent microparticle immunoassay (CMIA) that detects  
54 HIV-1/2 antibodies in serum or plasma, as well as HIV-1 p24 antigen. The chemiluminescent reaction  
55 resulting from the detection of HIV antibody and antigen is measured as relative light units (RLU) and a  
56 signal to cutoff ratio (S/Co) is calculated based on the reactivity of the specimen relative to an internal  
57 assay calibrator. Studies have demonstrated the ability of the ARCHITECT to detect acute infection,  
58 defined as HIV-1 NAT reactive and HIV-1 antibody negative [7-9], which is attributable to the sensitive  
59 detection of p24 antigen [10]. The ARCHITECT has a broad dynamic range for detection of the  
60 analytes and an association between S/Co and duration of infection has been demonstrated [11, 12].

61 HIV surveillance involves the collection of information related to new and existing cases of HIV  
62 infection and provides estimates of prevalence in a given population. The duration of HIV infection,  
63 however, cannot typically be inferred from routinely collected surveillance data and, therefore,  
64 estimation of incidence, the occurrence of new infections in a population, presents distinct challenges.  
65 Laboratory assays, developed or optimized for distinguishing recent from long-term HIV infection,  
66 allow for estimation of incidence based on a cross-sectional sampling of a population [13, 14]. Multiple  
67 HIV incidence assays have been evaluated for the measurement of a given biomarker, typically HIV  
68 antibody titers or avidity, including the commercially available HIV-1 LAg-Avidity EIA (Sedia  
69 Biosciences Corp., Portland, OR)[13, 15]. Testing for recent HIV-1 infection is typically independent of  
70 diagnostic testing, incurring additional costs, training needs, and dedicated equipment requirements.  
71 With the advent of new diagnostic technologies, there has been growing interest in evaluating select  
72 HIV diagnostic assays for determining recent infection.

73 In this study, we evaluated the feasibility of using the ARCHITECT S/Co to determine recent  
74 infection, using the standard assay protocol. The performance characteristics of the assay, such as the  
75 mean duration of recent infection (MDRI) and false recent rate (FRR), were estimated based on the S/Co  
76 from well-characterized subtype B HIV-1 seroconversion panels and optimal recency cutoffs were  
77 selected. The MDRI is defined as the average time that an HIV-infected person will spend in the  
78 “recent” state, as measured by a given incidence assay, while the FRR is a measure of the  
79 misclassification of long-term HIV infections as recent. HIV-1 recency status, based on the  
80 ARCHITECT S/Co values obtained through US surveillance systems, was compared to diagnostic test  
81 results from two prior prospective HIV-1 diagnostic studies.

82

## 83 Materials and methods

84

## Seroconversion Panels and Long-term Specimens

For estimation of the ARCHITECT S/Co MDRI, 198 specimens from 26 antiretroviral therapy (ART)-naïve, subtype B HIV-1-infected subjects were evaluated (Table 1). Five HIV-1 seroconversion panels (n=42 specimens) were purchased from Zeptometrix Corp. (Buffalo, NY) and three panels (n=14) were obtained from SeraCare Life Sciences, Inc. (Milford, MA). A total of nine longitudinal seroconversion panels (n=82 specimens) were obtained through the Seroconversion Incidence Panel Project (SIPP) in collaboration with SeraCare Life Sciences, Inc., described in detail previously [16]. Lastly, nine recent seroconverters (n=60 specimens) were obtained from the Women’s Interagency HIV Study (WIHS). WIHS is an ongoing, prospective, multi-center cohort study aimed towards understanding disease progression in HIV-infected women (<https://statepi.jhsph.edu/wihs/wordpress/>)[17, 18]. WIHS was established in 1993 and recruited high-risk HIV-negative or HIV-infected women into ten clinical sites: Brooklyn, NY; Bronx, NY; Chicago, IL; Los Angeles, CA; San Francisco, CA; Washington, DC; Atlanta, GA; Birmingham, AL/ Jackson, MS; Chapel Hill, NC; Miami, FL. Each site obtained approval from the local Institutional Review Board (IRB) and participants provided written informed consent.

**Table 1. HIV-1 seroconversion panel characteristics.**

| Specimen Source | # Specimens | # Participants | Median days LN-FP <sup>a</sup><br>(min-max) | Median days follow-up <sup>b</sup> (min-max) |
|-----------------|-------------|----------------|---------------------------------------------|----------------------------------------------|
| Zeptometrix     | 42          | 5              | 2 (2-8)                                     | 33 (13-52.5)                                 |
| SeraCare        | 14          | 3              | 4 (2-13)                                    | 20 (18-50.5)                                 |
| SIPP            | 82          | 9              | 30 (11-77)                                  | 365 (171-644)                                |
| WIHS            | 60          | 9              | 177 (135-217)                               | 2641 (1138.5-3329.5)                         |
| <b>TOTAL</b>    | <b>198</b>  | <b>26</b>      |                                             |                                              |

<sup>a</sup>Interval of time (days) between the last negative (LN) and first positive (FP) HIV antibody test.

<sup>b</sup>Total number of follow-up days for each HIV-1 seroconverter (days from 1<sup>st</sup> specimen collected).

110 For estimation of FRR, a total of 66 plasma specimens (single time points per study participant)  
111 were obtained from a 1982-1983 study in Atlanta, GA, involving subtype B HIV-1-infected men who  
112 have sex with men (MSM) diagnosed with lymphadenopathy [19-21]. The majority of the sample  
113 collection for the study occurred at a time prior to the advent of effective ART. The specimens included  
114 in this study were collected >2 years after the study entry date, since diagnostic test dates were not  
115 available for this cohort. All samples included in this study were unlinked from personal identifiers.  
116 CDC reviewed the protocol for the study and determined that CDC was not engaged in human subject  
117 research.

118

## 119 ARCHITECT HIV Ag/Ab Combo Assay

120

121 The ARCHITECT HIV Ag/Ab Combo assay was performed according to the manufacturer's  
122 instructions without modification. Plasma specimens were centrifuged for ten minutes at 8,000 rpm,  
123 transferred to polystyrene sample cups (Abbott Laboratories) in a total volume of 200 $\mu$ L, and then  
124 loaded onto the ARCHITECT i2000SR. The specimens were tested in singlicate due to volume  
125 limitations. The chemiluminescent signal, as measured by the instrument, is reported as a S/Co ratio of  
126 the relative light units (RLU) of the test sample to the RLU of the cutoff determined from an  
127 ARCHITECT calibrator. In addition to the kit controls, high and low external HIV-1 positive controls  
128 were included in each run. The controls were obtained from a proficiency testing panel derived from  
129 HIV-1-seropositive serum [22]. The high and low positive controls are consistent with long-term and  
130 recent infection, respectively, as measured by a previously characterized HIV incidence assay [23].

131

## 132 Estimation of Mean Duration of Recent Infection (MDRI)

133

134 The MDRI was estimated with a linear binomial regression of a logit link with a cubic  
135 polynomial for the time since seroconversion for the probability of testing “recent” [24]. The 95%  
136 confidence interval was obtained through bootstrapping (by resampling subjects) with 10,000 bootstrap  
137 samples. Furthermore, for seroconversion panels from Zeptometrix Corp, SIPP and SeraCare Life  
138 Sciences, Inc., the subject's testing history was used to obtain the estimated (earliest) date of detectable  
139 infection (EDDI). However, for the WIHS cohort, the seroconversion time was estimated as the middle  
140 point between the last negative and first positive test date due to lack of testing history data. Data points  
141 longer than 800 days from the last negative and the first positive were excluded from the analysis. The  
142 R package “inctool” was used for MDRI estimation (ref: [https://cran.r-](https://cran.r-project.org/web/packages/inctools/index.html)  
143 [project.org/web/packages/inctools/index.html](https://cran.r-project.org/web/packages/inctools/index.html)). The MDRI was estimated at ARCHITECT S/Co values  
144 of 300, 350, 400, 450, 500, 550, and 600.

145

## 146 Estimation of False-recent Rate (FRR)

147

148 The FRR is the probability that a subject, who is infected longer than T (defined time after  
149 infection), will produce a “recent” infection result [15, 24]. In our study, samples used to calculate the  
150 false-recent rate were from people with HIV infection for greater than T, defined as 730.5 days or two  
151 years. The recency cutoffs of 300, 350, 400, 450, 500, 550 and 600 were used for estimating FRR. The  
152 FRR was estimated with a random sampling of the MSM cohort (N=66) based on availability of  
153 sufficient sample volume (Table 2).

154

155 **Table 2. ARCHITECT HIV Ag/Ab Combo S/Co MDRI and FRR estimates.**

156

157

158

| <b>Cutoff</b> | <b>MDRI<sup>a</sup> (95% CI)</b> | <b>N recent</b> | <b>FRR MSM<sup>b</sup> (95% CI)</b> |
|---------------|----------------------------------|-----------------|-------------------------------------|
| 300           | 103 (86, 130)                    | 74              | 0.0 (0.0, 0.05)                     |
| 350           | 145 (101, 224)                   | 80              | 0.0 (0.0, 0.05)                     |
| 400           | 190 (120, 281)                   | 88              | 1.5 (0.0004, 0.08)                  |
| 450           | 247 (145, 356)                   | 94              | 4.6 (0.01, 12.7)                    |
| 500           | 291 (179, 406)                   | 102             | 7.6 (2.5, 16.8)                     |
| 550           | 366 (222, 483)                   | 114             | 7.6 (2.5, 16.8)                     |
| 600           | 445 (283, 564)                   | 125             | 9.1 (3.4, 18.7)                     |

159 <sup>a</sup>N= 198 specimens (26 Subjects)

160 <sup>b</sup>N = 66 specimens (66 subjects)

161 MDRI=mean duration of recent infection (days); FRR=false recent rate (%); CI=confidence interval

162

## 163 Comparison of Recency and Diagnostic Test Results

164

165 In this study, 681 specimens from the Screening Targeted Populations to Interrupt On-going  
166 Chains of HIV Transmission with Enhanced Partner Notification (STOP, n = 395)[25] and Los Angeles  
167 Rapid Test (LA Study, n = 286)[9, 26, 27] studies with available ARCHITECT, Multispot or Geenius,  
168 and Aptima Qualitative assay or HIV-1 viral load (VL) results were evaluated to assess the use of  
169 ARCHITECT for determining recent infection at each selected S/Co recency cutoff. Additionally, 661  
170 specimens (n =98, STOP; n =563, LA Study) from persons with established infection (both ART naïve  
171 and receiving ART) with HIV-1 VL data (COBAS AmpliPrep/COBAS TaqMan® HIV-1 Test, v2.0,  
172 Roche Molecular Diagnostics) were included to evaluate the impact of VL on the performance of the  
173 ARCHITECT.STOP was a prospective study evaluating the recommended diagnostic algorithm for  
174 detection of acute HIV infection and linkage to enhanced partner services in New York City, NY; San  
175 Francisco, CA; and Raleigh, Durham, and Winston- Salem, NC. The LA Study evaluated the  
176 performance characteristics of six rapid HIV tests and was conducted at two clinical sites: the Los  
177 Angeles Gay and Lesbian Center and the Altamed Clinic, which primarily serve persons at high risk for  
178 HIV infection [26].



179

## 180 Data Analysis

181

182 Differences between various groups of ARCHITECT S/Co values was determined using the  
183 Mann-Whitney U test. For the purposes of this study, two acute groups were defined based on the  
184 sequence of HIV test results. Acute group 1 was defined as ARCHITECT negative, Multispot/Geenius  
185 negative or indeterminate, and Aptima/VL reactive. Acute group 2 was defined as ARCHITECT  
186 reactive, Multispot/Geenius negative or indeterminate, and Aptima/VL reactive. Established infections  
187 were defined as having a reactive test result for all three tests.

188 The number of recent infections for the STOP and LA studies was determined based on the  
189 number of persons with ARCHITECT S/Co values below each of the evaluated recency cutoffs, with the  
190 exception of 300 and 350. These two recency cutoffs were not evaluated due to the extremely short  
191 MDRI estimates.

192

## 193 Results

194

### 195 Mean Duration of Recent Infection and False Recent Rate

196

197 The ARCHITECT S/Co for 198 specimens from 26 recent HIV-1 seroconverters demonstrated a  
198 rapid increase in assay values within the first year post-seroconversion, allowing for a clear distinction  
199 to be made between recent (<6 months) and long-term (> 2 years) infection (Fig 1A). The separation in  
200 S/Co values was further illustrated through the direct comparison of S/Co values at <6 months to >6  
201 months post-seroconversion (Fig 1B). No overlap was observed in the 25<sup>th</sup> to 75<sup>th</sup> percentile of  
202 reactivity and higher mean values were noted at >6 months as compared to <6 months (P<0.0001).  
203 Furthermore, a difference in S/Co values (P<0.0001) was also observed between the recent group (<6

204 months post-seroconversion) compared to values for the 248 persons with long-term infection (>2 years  
205 post-seroconversion). The mean S/Co was 228.3, 726.9, and 731.0 for the <6 months, > 6 months, and  
206 >2 year post-seroconversion groups, respectively.

207

208 **Fig 1. Longitudinal ARCHITECT HIV Ag/Ab Combo signal-to-cutoff (S/Co) values from recent**  
209 **HIV-1 seroconverters. (A)** The S/Co ratios for longitudinally collected specimens from 26  
210 antiretroviral therapy-naive recent seroconverters (N=198) were plotted over days since estimated  
211 seroconversion. The solid red line represents the logarithmic curve fit to the data using non-linear  
212 regression. **(B)** Box plots show the 25th to 75th percentile of the S/Co ratios at indicated days post-  
213 seroconversion, while the middle lines represent the median values and whiskers represent the minimum  
214 and maximum values. The mean is indicated by “+”.

215

216 The MDRI estimated at the ARCHITECT S/Co cutoffs of 300, 350, 400, 450, 500, 550, and 600  
217 are summarized in Table 2. The MDRI ranged from a minimum of 103 to a maximum of 445 days,  
218 increasing with higher cutoff values. The MDRI at cutoffs 400, 450, 500, and 550 were within six  
219 months to one year, at 190, 247, 291, and 366 days, respectively. The FRR for the MSM cohort, ranged  
220 from 0.0 to 9.1% at the different S/Co cutoffs evaluated.

221

## 222 Comparison of HIV-1 Recency and Diagnostic Test Results

223

224 The number of HIV diagnoses from both the STOP and LA studies is summarized by category  
225 (acute group 1, acute group 2, and established) in Table 3. For both studies, the majority of diagnoses  
226 (77%) fell within the established category (64% STOP, 94% LA study). For both acute groups, the  
227 number of recent infections was highly consistent for all cutoffs evaluated. All samples from persons in  
228 acute group 1 were ARCHITECT negative, as samples from these individuals were HIV-1 NAT reactive

229 only and determined to be from persons with acute infection based on the CDC/APHL HIV laboratory  
 230 testing algorithm. A total of 132 out of 133 samples (99.2%) in acute group 2 were determined to be  
 231 from persons with recent infection (131 out of 133 for the lowest cutoff of 400). The number of recent  
 232 infections identified in the established group was variable, ranging from 54% to 80% of the total  
 233 established infections, increasing with higher recency cutoff value.

234

235 **Table 3. HIV diagnostic test results summary for STOP and LA study cohorts.**

|               | Diagnostic Test Results |                       |               |             |                 |            | Number of Recent Infections |            |            |            |            |
|---------------|-------------------------|-----------------------|---------------|-------------|-----------------|------------|-----------------------------|------------|------------|------------|------------|
|               | ARCHITECT               | Multispot/<br>Geenius | Aptima/V<br>L | N<br>(STOP) | N (LA<br>Study) | N (Total)  | 400                         | 450        | 500        | 550        | 600        |
| Acute Group 1 | NEG                     | NEG/IND               | +             | 19          | 7               | 26         | 26                          | 26         | 26         | 26         | 26         |
| Acute Group 2 | +                       | NEG/IND               | +             | 124         | 9               | 133        | 131                         | 132        | 132        | 132        | 132        |
| Established   | +                       | +                     | +             | 252         | 270             | 522        | 281                         | 315        | 351        | 391        | 415        |
| <b>TOTAL</b>  |                         |                       |               | <b>395</b>  | <b>286</b>      | <b>681</b> | <b>438</b>                  | <b>473</b> | <b>509</b> | <b>549</b> | <b>573</b> |

236 <sup>a</sup>Number of recent infections for each group at the evaluated ARCHITECT HIV Ag/Ab Combo signal-to-cutoff  
 237 ratios

238 VL=viral load; +=reactive test result; NEG=nonreactive test result; IND=indeterminate test result

239

240 The distribution of ARCHITECT S/Co for the acute and established groups is shown in Fig 2A.  
 241 The S/Co for all specimens within acute group 1 is below the limit of detection for the ARCHITECT.  
 242 The mean S/Co was 60.4 and 407.8 for specimens from acute group 2 and the established group,  
 243 respectively. A difference ( $P < 0.0001$ ) was noted between the S/Co values for acute group 2 and the  
 244 established group. ARCHITECT S/Co values for the established groups from the STOP and LA studies  
 245 were further evaluated based on VL and reported ART use (Fig 2B). Higher S/Co values ( $P = 0.0472$ )  
 246 were observed in the established group with a VL > 1,000 RNA copies/mL compared to a VL < 1,000  
 247 RNA copies/mL (median S/Co of 422.7 versus 394.9, respectively). Interestingly, a higher median S/Co

248 ratio (P=0.0002) was observed in the ART-use group compared to the ART-naive group (median S/Co  
249 of 419.7 versus 373.8, respectively).

250

251 **Figure 2. Performance of the ARCHITECT HIV Combo Assay signal-to-cutoff (S/Co) in**  
252 **Determining Recent Infection.** Box plots comparing the ARCHITECT HIV Ag/Ab Combo S/Co  
253 ratios in the acute and established groups (**A**), the low (<1,000 RNA copies/mL; N=298) versus high  
254 (>1,000 RNA copies/mL; N=363) plasma viral loads (VL) samples, and no antiretroviral therapy (ART;  
255 N=370) versus ART-use groups (N=276) (**B**) in the STOP and LA study cohorts. The boxes represent  
256 the 25th to 75th percentile of the S/Co ratios, while the middle lines represent the median values and  
257 whiskers represent the minimum and maximum values. The mean is indicated by “+”.

## Discussion

Given that HIV incidence is a valuable measure for monitoring HIV trends over time in a population, there is a continued goal to develop and evaluate methods that would reduce error associated with these estimates and to expand HIV incidence testing in settings where additional laboratory testing is not feasible. In this study, we demonstrated the performance of the ARCHITECT, an HIV-1/HIV-2 antigen/antibody combination immunoassay, for determining recent infection. The data presented in this study suggest that S/Co values obtained with the ARCHITECT can serve a dual purpose, providing both HIV diagnostic test results as well as recency data that can be incorporated into population-level incidence estimates or used for other research purposes, requiring no additional testing or modifications to the assay protocol. A S/Co recency cutoff of 400 meets the recommended acceptance criteria for HIV incidence assays for evaluation of subtype B HIV-1 incidence. Since ARCHITECT S/Co values are available through diagnostic screening, the costs associated with estimating HIV incidence would be significantly reduced, potentially expanding the capability of some laboratories to provide recency data for population-based incidence estimation.

Recently, Suligoi *et al.* performed an avidity modification with the ARCHITECT and demonstrated that an avidity index, which is a measure of the binding strength between antibody and antigen, is an accurate marker for discriminating recent from long-term infection [28]. In this study, we showed that the ARCHITECT S/Co values, alone, from longitudinal seroconversion panels exhibited a biomarker maturation curve (Fig 2A) similar to other well-performing or promising incidence assays [23, 29], which is suggestive of an assay's ability to effectively distinguish recent from long-term infection. Similarly, Grebe *et al.* demonstrated comparable performance between the ARCHITECT S/Co using an unmodified protocol and HIV-1 LAg-Avidity EIA [12]. However, performance characteristics of the ARCHITECT for determining recency cannot be compared between the two studies given the

notable differences in subtype diversity and inclusion criteria for the specimens used to estimate MDRI. The performance of the Geenius HIV-1/2 Supplemental Assay, a single-use immunochromatographic assay that detects and differentiates antibodies to HIV-1 and HIV-2, was also evaluated for determining recent infection and preliminary findings indicate that the assay may be useful for both HIV diagnosis and recency determination [24]. One caveat to this approach is that recency is determined for the Geenius assay based on band intensity; however, the raw band intensity values are not readily accessible through the Geenius reader for the standard user limiting its utility. Given that the ARCHITECT and Geenius are frequently used concurrently for diagnosis of HIV in the US, an algorithm composed of both test results may be considered for determining recent HIV infection.

ARCHITECT S/Co values are routinely collected in some US laboratories through the implementation of the HIV diagnostic testing algorithm; therefore, we were able to demonstrate the relationship between the HIV diagnostics test results and recency determination for two prospective diagnostic studies. Here, we determined recency at the individual level, though HIV recency data are predominantly used for estimation of population-level incidence. The benefits of recency determination at the individual level are yet to be fully explored; however, there may be utility in capturing the number of recent infections in a cohort for research purposes. As demonstrated with the STOP and LA cohorts, new diagnoses determined to be established infections by the diagnostic testing algorithm include both long-term infections, as well as persons within the MDRI of the recency assay, as HIV antibody has exceeded the limit of detection for diagnostic tests but antibody titers are continuing to increase or evolve. Overall, these data suggest that the ARCHITECT S/Co ratio is predictive of time since seroconversion and has the capability to reliably detect changes in biomarker levels over time.

Although the performance characteristics of the ARCHITECT presented here are promising, additional data are needed to fine-tune the MDRI and FRR estimates. A limitation of this study is the relatively small number and limited diversity of specimens available for the MDRI and FRR analyses.

Certain population characteristics, such as ART use, may greatly impact FRR estimates. The MSM cohort evaluated in this study is unique in that the original study enrolled participants at a time prior to the availability of effective ART, so ART likely had little to no impact on the FRR estimates. Furthermore, Abbott has recently introduced the Alinity family of diagnostic testing platforms. Further investigation is needed to determine whether the ARCHITECT and Alinity platforms can be used interchangeably for determining recent HIV infection, though an initial evaluation has indicated comparable performance for detection of HIV [30]. ART-use has proven to be problematic for most HIV incidence assays and a slight, yet significant, reduction in the median S/Co in our study was associated with VLs less than 1,000 HIV RNA copies/mL for the ARCHITECT. However, sufficient data were not available to determine whether ART-induced virus suppression leads to increased FRRs. Prior studies have recommended that HIV incidence assays be used in conjunction with VL to eliminate potential false-recent results due to suppressed VLs in persons receiving ART and elite controllers [13, 31].

In summary, the data presented here suggest that the performance characteristics of the ARCHITECT HIV Ag/Ab Combo test meets the acceptance criteria for a HIV incidence assay and, for laboratories that employ the platform for HIV diagnostic testing, the utility of the assay may be expanded for additional surveillance applications.

## Acknowledgements

The authors would like to thank Alexandra Tejada at the CDC for providing training and assistance with the ARCHITECT platform. The authors would also like to thank Eduard Grebe for valuable discussions on the MDRI estimation. Use of trade names is for identification only and does not imply endorsement by the U.S. Department of Health and Human Services, the Public Health Service,

the National Institutes of Health (NIH), or the CDC. The findings and conclusions in this report are those of the authors and do not necessarily represent the views of the NIH or CDC.

Data in this manuscript were collected by the Women’s Interagency HIV Study (WIHS). WIHS (Principal Investigators): UAB-MS WIHS (Mirjam-Colette Kempf and Deborah Konkle-Parker), U01-AI-103401; Atlanta WIHS (Ighovwerha Ofotokun and Gina Wingood), U01-AI-103408; Bronx WIHS (Kathryn Anastos and Anjali Sharma), U01-AI-035004; Brooklyn WIHS (Howard Minkoff and Deborah Gustafson), U01-AI-031834; Chicago WIHS (Mardge Cohen and Audrey French), U01-AI-034993; Metropolitan Washington WIHS (Seble Kassaye), U01-AI-034994; Miami WIHS (Margaret Fischl and Lisa Metsch), U01-AI-103397; UNC WIHS (Adaora Adimora), U01-AI-103390; Connie Wofsy Women’s HIV Study, Northern California (Ruth Greenblatt, Bradley Aouizerat, and Phyllis Tien), U01-AI-034989; WIHS Data Management and Analysis Center (Stephen Gange and Elizabeth Golub), U01-AI-042590; Southern California WIHS (Joel Milam), U01-HD-032632 (WIHS I – WIHS IV). The WIHS is funded primarily by the National Institute of Allergy and Infectious Diseases (NIAID), with additional co-funding from the Eunice Kennedy Shriver National Institute of Child Health and Human Development (NICHD), the National Cancer Institute (NCI), the National Institute on Drug Abuse (NIDA), and the National Institute on Mental Health (NIMH). Targeted supplemental funding for specific projects is also provided by the National Institute of Dental and Craniofacial Research (NIDCR), the National Institute on Alcohol Abuse and Alcoholism (NIAAA), the National Institute on Deafness and other Communication Disorders (NIDCD), and the NIH Office of Research on Women’s Health. WIHS data collection is also supported by UL1-TR000004 (UCSF CTSA), UL1-TR000454 (Atlanta CTSA), and P30-AI-050410 (UNC CFAR).

The STOP study was supported by a cooperative agreement between the Centers for Disease Control and Prevention (CDC) and the San Francisco Department of Public Health (5U01PS001564),



New York City Department of Health and Mental Hygiene (5U01PS001561), and the University of North Carolina at Chapel Hill (5U01PS001559).

The LA Rapid testing study was supported through a cooperative agreement with the Health Research Association of Los Angeles County (U64 CCU919524). The authors would like to thank the study participants and staff, especially Apurva Uniyal, Peter Kerndt, Lashawnda Royal, and Staeci Morita.

## References

1. APHL C. Laboratory Testing for the Diagnosis of HIV Infection: Updated Recommendations 2014. Available from: <http://dx.doi.org/10.15620/cdc.23447>.
2. Masciotra S, Smith AJ, Youngpairoj AS, Sprinkle P, Miles I, Sionean C, et al. Evaluation of the CDC proposed laboratory HIV testing algorithm among men who have sex with men (MSM) from five US metropolitan statistical areas using specimens collected in 2011. *J Clin Virol.* 2013;58 Suppl 1:e8-e12. doi: 10.1016/j.jcv.2013.09.002. PubMed PMID: 24342483.
3. Pandori MW, Westheimer E, Gay C, Moss N, Fu J, Hightow-Weidman LB, et al. The Multispot rapid HIV-1/HIV-2 differentiation assay is comparable with the Western blot and an immunofluorescence assay at confirming HIV infection in a prospective study in three regions of the United States. *J Clin Virol.* 2013;58 Suppl 1:e92-6. doi: 10.1016/j.jcv.2013.10.006. PubMed PMID: 24342485.
4. Fordan S, Bennett B, Lee M, Crowe S. Comparative performance of the Geenius HIV-1/HIV-2 supplemental test in Florida's public health testing population. *J Clin Virol.* 2017;91:79-83. doi: 10.1016/j.jcv.2017.04.005. PubMed PMID: 28434810.
5. Nasrullah M, Wesolowski LG, Meyer WA, 3rd, Owen SM, Masciotra S, Vorwald C, et al. Performance of a fourth-generation HIV screening assay and an alternative HIV diagnostic testing algorithm. *AIDS.* 2013;27(5):731-7. doi: 10.1097/QAD.0b013e32835bc535. PubMed PMID: 23135170; PubMed Central PMCID: PMC4582659.
6. Wesolowski LG, Wroblewski K, Bennett SB, Parker MM, Hagan C, Ethridge SF, et al. Nucleic acid testing by public health referral laboratories for public health laboratories using the U.S. HIV diagnostic testing algorithm. *J Clin Virol.* 2015;65:6-10. doi: 10.1016/j.jcv.2015.01.017. PubMed PMID: 25766979; PubMed Central PMCID: PMC4586070.
7. Eshleman SH, Khaki L, Laeyendecker O, Piwowar-Manning E, Johnson-Lewis L, Husnik M, et al. Detection of individuals with acute HIV-1 infection using the ARCHITECT HIV Ag/Ab Combo assay. *J Acquir Immune Defic Syndr.* 2009;52(1):121-4. doi: 10.1097/QAI.0b013e3181ab61e1. PubMed PMID: 19506484; PubMed Central PMCID: PMC4586070.

8. Pandori MW, Hackett J, Jr., Louie B, Vallari A, Dowling T, Liska S, et al. Assessment of the ability of a fourth-generation immunoassay for human immunodeficiency virus (HIV) antibody and p24 antigen to detect both acute and recent HIV infections in a high-risk setting. *J Clin Microbiol.* 2009;47(8):2639-42. doi: 10.1128/JCM.00119-09. PubMed PMID: 19535523; PubMed Central PMCID: PMCPMC2725691.
9. Chavez P, Wesolowski L, Patel P, Delaney K, Owen SM. Evaluation of the performance of the Abbott ARCHITECT HIV Ag/Ab Combo Assay. *J Clin Virol.* 2011;52 Suppl 1:S51-5. doi: 10.1016/j.jcv.2011.09.010. PubMed PMID: 21983253.
10. Kwon JA, Yoon SY, Lee CK, Lim CS, Lee KN, Sung HJ, et al. Performance evaluation of three automated human immunodeficiency virus antigen-antibody combination immunoassays. *J Virol Methods.* 2006;133(1):20-6. doi: 10.1016/j.jviromet.2005.10.013. PubMed PMID: 16313975.
11. Ramos EM, Harb S, Dragavon J, Swenson P, Stekler JD, Coombs RW. Performance of an alternative HIV diagnostic algorithm using the ARCHITECT HIV Ag/Ab Combo assay and potential utility of sample-to-cutoff ratio to discriminate primary from established infection. *J Clin Virol.* 2013;58 Suppl 1:e38-43. doi: 10.1016/j.jcv.2013.08.014. PubMed PMID: 24029686; PubMed Central PMCID: PMCPMC4209943.
12. Grebe E, Welte A, Hall J, Keating SM, Facente SN, Marson K, et al. Infection Staging and Incidence Surveillance Applications of High Dynamic Range Diagnostic Immuno-Assay Platforms. *J Acquir Immune Defic Syndr.* 2017;76(5):547-55. Epub 2017/09/16. doi: 10.1097/QAI.0000000000001537. PubMed PMID: 28914669; PubMed Central PMCID: PMCPMC5680100.
13. Murphy G, Pilcher CD, Keating SM, Kassanjee R, Facente SN, Welte A, et al. Moving towards a reliable HIV incidence test - current status, resources available, future directions and challenges ahead. *Epidemiology and Infection.* 2017;145(5):925-41. doi: 10.1017/S0950268816002910. PubMed PMID: 28004622.
14. Busch MP, Pilcher CD, Mastro TD, Kaldor J, Vercauteren G, Rodriguez W, et al. Beyond detuning: 10 years of progress and new challenges in the development and application of assays for HIV incidence estimation. *AIDS.* 2010;24(18):2763-71. doi: 10.1097/QAD.0b013e32833f1142. PubMed PMID: 20975514.
15. Kassanjee R, Pilcher CD, Keating SM, Facente SN, McKinney E, Price MA, et al. Independent assessment of candidate HIV incidence assays on specimens in the CEPHIA repository. *AIDS.* 2014;28(16):2439-49. doi: 10.1097/QAD.0000000000000429. PubMed PMID: 25144218; PubMed Central PMCID: PMC4210690.

16. Curtis KA, Ambrose KM, Kennedy MS, Owen SM. Evaluation of dried blood spots with a multiplex assay for measuring recent HIV-1 infection. *PLoS One*. 2014;9(9):e107153. doi: 10.1371/journal.pone.0107153. PubMed PMID: 25232736; PubMed Central PMCID: PMC4169399.
17. Bacon MC, von Wyl V, Alden C, Sharp G, Robison E, Hessel N, et al. The Women's Interagency HIV Study: an observational cohort brings clinical sciences to the bench. *Clin Diagn Lab Immunol*. 2005;12(9):1013-9. doi: 10.1128/CDLI.12.9.1013-1019.2005. PubMed PMID: 16148165; PubMed Central PMCID: PMC1235804.
18. Barkan SE, Melnick SL, Preston-Martin S, Weber K, Kalish LA, Miotti P, et al. The Women's Interagency HIV Study. WIHS Collaborative Study Group. *Epidemiology*. 1998;9(2):117-25. PubMed PMID: 9504278.
19. Fishbein DB, Kaplan JE, Spira TJ, Miller B, Schonberger LB, Pinsky PF, et al. Unexplained lymphadenopathy in homosexual men. A longitudinal study. *JAMA*. 1985;254(7):930-5. PubMed PMID: 2991618.
20. Kaplan JE, Spira TJ, Fishbein DB, Pinsky PF, Schonberger LB. Lymphadenopathy syndrome in homosexual men. Evidence for continuing risk of developing the acquired immunodeficiency syndrome. *JAMA*. 1987;257(3):335-7. PubMed PMID: 2948032.
21. Kaplan JE, Spira TJ, Fishbein DB, Lynn HS. Ten-year follow-up of HIV-infected homosexual men with lymphadenopathy syndrome: evidence for continuing risk of developing AIDS. *J Acquir Immune Defic Syndr*. 1992;5(6):565-70. PubMed PMID: 1588492.
22. Mei JV, Kennedy M, Linley L, Hanson D, Schiffer J, Ethridge S, et al. Standardization and monitoring of laboratory performance and quality assurance by use of the less-sensitive HIV incidence assay: seven years of results. *J Acquir Immune Defic Syndr*. 2011;58(5):482-8. doi: 10.1097/QAI.0b013e318230dd77. PubMed PMID: 21857352.
23. Curtis KA, Hanson DL, Price KA, Owen SM. Performance characteristics of an antibody-based multiplex kit for determining recent HIV-1 infection. *PLoS One*. 2017;12(5):e0176593. doi: 10.1371/journal.pone.0176593. PubMed PMID: 28472089; PubMed Central PMCID: PMC5417525.

24. Keating SM, Kassanjee R, Lebedeva M, Facente SN, MacArthur JC, Grebe E, et al. Performance of the Bio-Rad Geenius HIV1/2 Supplemental Assay in Detecting "Recent" HIV Infection and Calculating Population Incidence. *J Acquir Immune Defic Syndr*. 2016;73(5):581-8. doi: 10.1097/QAI.0000000000001146. PubMed PMID: 27509247; PubMed Central PMCID: PMC5110377.
25. Peters PJ, Westheimer E, Cohen S, Hightow-Weidman LB, Moss N, Tsoi B, et al. Screening Yield of HIV Antigen/Antibody Combination and Pooled HIV RNA Testing for Acute HIV Infection in a High-Prevalence Population. *JAMA*. 2016;315(7):682-90. doi: 10.1001/jama.2016.0286. PubMed PMID: 26881371.
26. Delaney KP, Branson BM, Uniyal A, Phillips S, Candal D, Owen SM, et al. Evaluation of the performance characteristics of 6 rapid HIV antibody tests. *Clinical infectious diseases : an official publication of the Infectious Diseases Society of America*. 2011;52(2):257-63. doi: 10.1093/cid/ciq068. PubMed PMID: 21288853.
27. Delaney KP. Evaluation of Newly Approved HIV Antigen-Antibody Tests Individually and When Used in the CDC/APHL HIV Diagnostic Algorithm. HIV Diagnostics Conference; March 22, 2016; Atlanta, GA2016.
28. Suligoi B, Regine V, Raimondo M, Rodella A, Terlenghi L, Caruso A, et al. HIV avidity index performance using a modified fourth-generation immunoassay to detect recent HIV infections. *Clin Chem Lab Med*. 2017. doi: 10.1515/cclm-2016-1192. PubMed PMID: 28672745.
29. Duong YT, Kassanjee R, Welte A, Morgan M, De A, Dobbs T, et al. Recalibration of the limiting antigen avidity EIA to determine mean duration of recent infection in divergent HIV-1 subtypes. *PLoS One*. 2015;10(2):e0114947. Epub 2015/02/25. doi: 10.1371/journal.pone.0114947. PubMed PMID: 25710171; PubMed Central PMCID: PMC4339840.
30. Lackner KJ. Evaluation of and experiences with the Abbott alinity clinical chemistry and immunoassay systems. LMCE 2017 & KSLM 58th Annual Meeting; Seoul, Korea2017.
31. Kassanjee R, Pilcher CD, Busch MP, Murphy G, Facente SN, Keating SM, et al. Viral load criteria and threshold optimization to improve HIV incidence assay characteristics. *AIDS*. 2016;30(15):2361-71. Epub 2016/07/28. doi: 10.1097/QAD.0000000000001209. PubMed PMID: 27454561; PubMed Central PMCID: PMC5024345.



**A**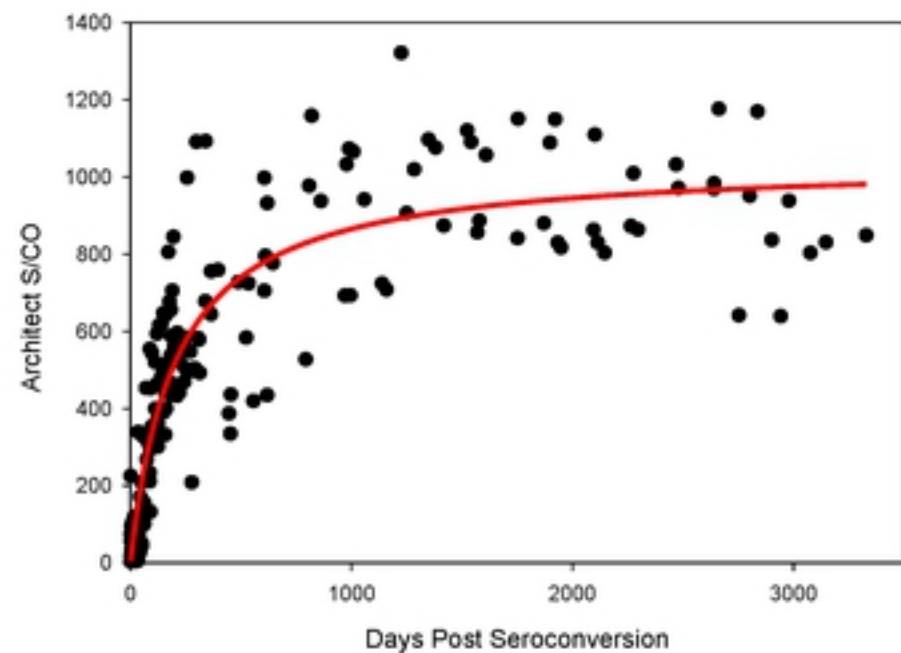**B**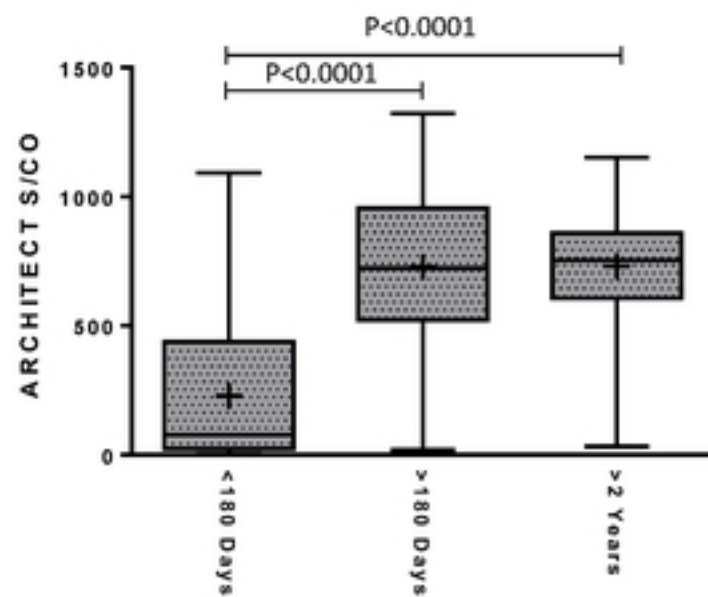**Figure 1**

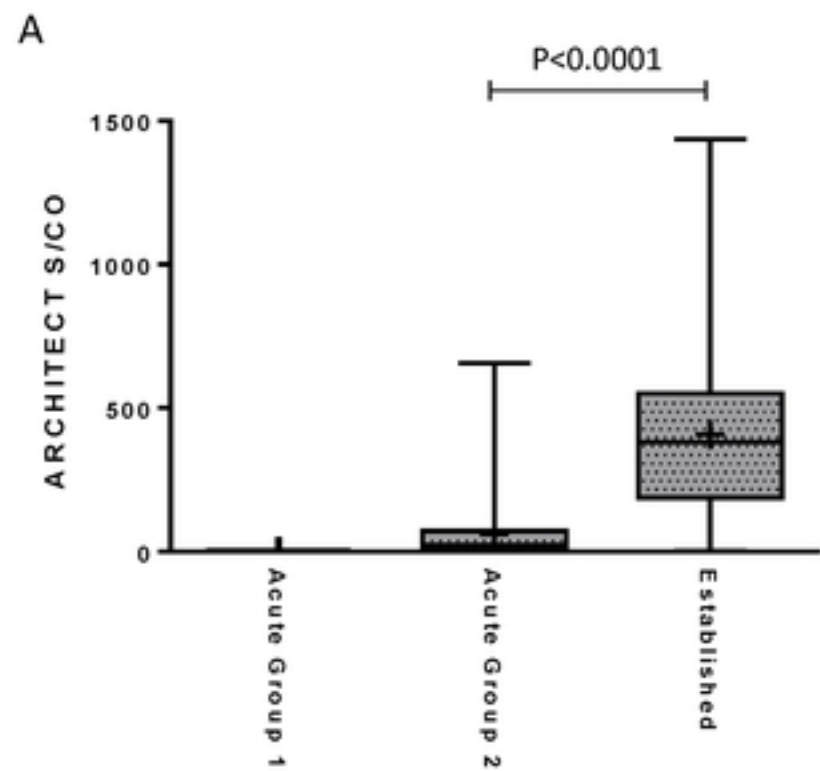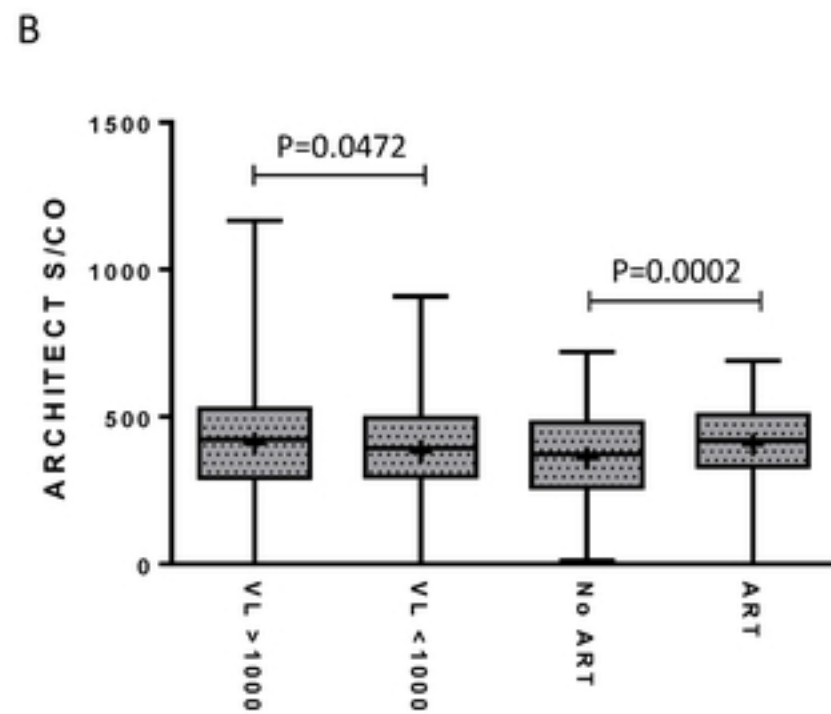

Figure 2
